# Supplementary material
Source: PubMed Central journal article supplement (PMC4121370)
Supplement: epi-9-600-s01.pdf [file epi-9-600-s01.pdf]

## **Supplemental Material to:**

**Laura Tudisco, Floriana Della Ragione, Valeria Tarallo, Ivana Apicella, Maurizio D'Esposito, Maria Rosaria Matarazzo, and Sandro De Falco**

**Epigenetic control of hypoxia inducible factor-1 $\alpha$ -dependent expression of placental growth factor in hypoxic conditions**

**Epigenetics 2014; 9(4)**

**<http://dx.doi.org/10.4161/epi.27835>**

**<http://www.landesbioscience.com/journals/epigenetics/article/27835/>**

**Table S1.** Primers used in ChIP analysis

| Target  | Amplicon | primer         | Sequence 5' → 3'      |
|---------|----------|----------------|-----------------------|
| hPIGF   | 1        | upper (-9730)  | AAACTGGGAGGGAATGGAAG  |
|         |          | lower (-9570)  | GTGCTGTTTCCCATTTTTGC  |
|         | 2        | upper (-4903)  | TGTCCCAGACACTGAGCAAG  |
|         |          | lower (-4747)  | ACCTTGAATTCCCCTCCATC  |
|         | 3        | upper (-3561)  | GTGTTGAGTTGTGGGCACTG  |
|         |          | lower (-3419)  | GAAAATGGAGCGATTTGCAT  |
|         | 4        | upper (-1702)  | TGCCACATACACAAATCCA   |
|         |          | lower (-1554)  | ATTGTGGAGGGTCACTGTGC  |
|         | 5        | upper (-1168)  | GCAGTGAGAGGAGTGGTGGT  |
|         |          | lower (-1022)  | CTTTCGGTGGGACTGTGAGT  |
|         | 6        | upper (-350)   | CTGCAGAGGCGGTTAGATCA  |
|         |          | lower (-176)   | GGCTCTCGGCAGGTCCAG    |
|         | 7        | upper (+2128)  | ACCATGCGTTTCCATTGATT  |
|         |          | lower (+2237)  | TCTCGTTGCCCTTTGAAGAC  |
|         | 8        | upper (+8199)  | CCCCTTTTGTTGGAGTGTIG  |
|         |          | lower (+8305)  | ACCCAGGAGGGTTCATTACC  |
|         | 9        | upper (+13445) | CGTGATCTCCCCTCACACTT  |
|         |          | lower (+13578) | CATCCAGGCAGCTCTTTCTC  |
|         | 10       | upper (+15976) | TTGAGACTAGGCCCATTTGC  |
|         |          | lower (+16108) | CTCTCTCCTTCCCCTGTCC   |
| hVEGF-A | V-PC     | upper (-1005)  | GGTTTTGCCAGACTCCACAG  |
|         |          | lower (-868)   | CTTCCCAGGGGAGAAGAATTT |
|         | V-NC     | upper (-1762)  | GGACACCATACCGATGGAAC  |
|         |          | lower (-1364)  | CCCCTTTTCCTCCA ACTCTC |
|         | V-2-Int  | upper (+5161)  | AAAGCCTGGTTGTTGGAGTG  |
|         |          | lower (+5391)  | GAGGGGATAGCAGGAAGGTC  |
| mPIGF   | 11       | upper (-1945)  | TTTGGAGCAGAGCCTACAGC  |
|         |          | lower (-1812)  | ACACACGGATTGGGCATATT  |
|         | 12       | upper (-1001)  | CAGGAACACAGGAGGTTACCA |
|         |          | lower (-889)   | ACTGAACGTGCCAGTTACAC  |
|         | 13       | upper (-314)   | ATCTCCAAGGCAGATGTTGG  |
|         |          | lower (-202)   | CGGAGCTAGGCGTTCATTAG  |
|         | 14       | upper (+1740)  | CATGGGTTAGGGTCACCAAG  |
|         |          | lower (+1841)  | CCAAGACTCCATCTGCATCC  |
|         | 15       | upper (+3892)  | AGTGTCAGAAGGTCCCCACA  |
|         |          | lower (+4011)  | CCAAGACTCCATCTGCATCC  |
|         | 16       | upper (+6584)  | AAGAAGGGGAGAGCAACCAC  |
|         |          | lower (+6708)  | CTCTGTGCGATGCTGACAAG  |

---

|         |      |               |                       |
|---------|------|---------------|-----------------------|
| mVEGF-A | V-PC | upper (-944)  | CCCAGCTGTCTCTCCTTCAG  |
|         |      | lower (-831)  | TGAGAACGGGAAGTGGAGTT  |
|         | V-NC | upper (-1762) | GGACACCATACCGATGGAAC  |
|         |      | lower (-1364) | CCCCTTTTCCTCCA ACTCTC |

---

Numbers in primer column represent the first nucleotide (5' position) of upper primers or the last one (3' position) of lower primers respect to the transcription start site. V-PC, VEGF positive control; V-NC, VEGF negative control; V-2-Int, VEGF amplicon located in the second intron of human VEGF-A.
